# Supplementary material for: ATM-kinase deficiency triggers early multi-compartment remodeling of the cerebellar microenvironment
Source: Research Square preprint supplement (doi:10.21203/rs.3.rs-8832557/v1), 2026-02-17
Supplement: Supplementary file 1 [file 0f6f45a234a720c23e27676d.xlsx]

## Sheet: Table S3
Table S1. Complete list of differentially expressed proteins (DEPs). Proteins are ranked by absolute Log₂ fold-change (FC). Columns include gene identifiers, Log₂ FC, p-value, adjusted p-value (Adj p-value, Benjamini-Hochberg), and protein description.
Entrez Gene ID	Symbol	ID	Log2 FC	p-value	Adj p-value	Description
497097	Xkr4	Q5GH67	4.02	0.0150247	0.547098	XK-related protein 4 [OS=Mus musculus]
70611	Fbxo33	Q8VE08	3.69	0.000486847	0.173617	F-box only protein 33 [OS=Mus musculus]
74370	Rptor	A4FUW1	3.02	0.00122779	0.268065	submitted name: 4932417H02Rik protein [OS=Mus musculus]
	Srpk3	Q684J2	2.79	0.0372506	0.660249	non-specific serine/threonine protein kinase [OS=Mus musculus]
216821	Tmem11	E9Q933	2.45	0.020642	0.585045	submitted name: Transmembrane protein 11 [OS=Mus musculus]
226518	Nmnat2	Q5HZI3	2.29	0.0404758	0.670236	Nicotinamide/nicotinic acid mononucleotide adenylyltransferase 2 [OS=Mus musculus]
12819	Col15a1	O35206	2.15	0.000779607	0.215861	Collagen alpha-1(XV) chain [OS=Mus musculus]
76905	Lrg1	Q91XL1	2.14	0.00765195	0.435258	submitted name: Leucine-rich HEV glycoprotein [OS=Mus musculus]
67375	Qprt	Q91X91	1.99	0.00145631	0.283797	Nicotinate-nucleotide pyrophosphorylase [carboxylating] [OS=Mus musculus]
16772	Lama1	P19137	1.8	6.51682e-06	0.0642987	Laminin subunit alpha-1 [OS=Mus musculus]
	Lamb1	B9EKB0	1.76	0.0327333	0.645934	submitted name: Laminin B1 subunit 1 [OS=Mus musculus]
	Megf11	B7ZWF7	1.59	0.00586992	0.393094	submitted name: Megf11 protein [OS=Mus musculus]
22342	Lin7b	O88951	1.54	0.00311301	0.315282	Protein lin-7 homolog B [OS=Mus musculus]
56357	Ivd	Q9JHI5	1.51	0.0473421	0.680288	Isovaleryl-CoA dehydrogenase, mitochondrial [OS=Mus musculus]
	Pus1	Q3TT85	1.49	0.00387009	0.34185	Pseudouridine synthase I TruA alpha/beta domain-containing protein [OS=Mus musculus]
27369	Dguok	Q9QX60	1.45	0.0476698	0.680288	Deoxyguanosine kinase, mitochondrial [OS=Mus musculus]
	C1qa	Q3TXB1	1.42	0.0172213	0.574619	Complement C1q subcomponent subunit A [OS=Mus musculus]
	Calcoco1	E9Q7U2	1.29	0.0414407	0.672359	submitted name: Calcium binding and coiled coil domain 1 [OS=Mus musculus]
380836	Mrs2	Q5NCE8	1.28	0.00160807	0.283797	Magnesium transporter MRS2 homolog, mitochondrial [OS=Mus musculus]
20649	Sntb1	Q99L88	1.27	0.00744217	0.431197	Beta-1-syntrophin [OS=Mus musculus]
68428	Steap3	A0A0R4J1G9	1.26	0.00571974	0.391224	submitted name: STEAP family member 3 [OS=Mus musculus]
15482	Hspa1l	A1L347	1.25	0.00213427	0.299798	Heat shock 70 kDa protein 1-like [OS=Mus musculus]
100900	Hscb	A0A0R4J0T0	1.24	0.0106045	0.478633	submitted name: HscB iron-sulfur cluster co-chaperone [OS=Mus musculus]
104001	Rtn1	Q7M6W1	1.21	0.0467686	0.680288	Reticulon [OS=Mus musculus]
12290	Cacna1e	A0A087WS83	1.18	0.00469014	0.36855	Voltage-dependent R-type calcium channel subunit alpha [OS=Mus musculus]
13383	Dlg1	E9Q9H0	1.15	0.00524554	0.387128	submitted name: Discs large MAGUK scaffold protein 1 [OS=Mus musculus]
	Tpcn1	Q3UV38	1.13	0.0134039	0.528738	Ion transport domain-containing protein [OS=Mus musculus]
11826	Aqp1	Q02013	1.1	0.0415439	0.672359	Aquaporin-1 [OS=Mus musculus]
52174	Tmem222	Q8BVA2	1.09	0.00871513	0.449355	Transmembrane protein 222 [OS=Mus musculus]
	Col6a3	A0A087WS16	1.09	0.00814448	0.436265	submitted name: Collagen, type VI, alpha 3 [OS=Mus musculus]
	Ptn	Q9CSX6	1.08	0.00140952	0.283797	Pleiotrophin [OS=Mus musculus]
11702	Amd1	P0DMN7	1.06	0.0227369	0.601202	S-adenosylmethionine decarboxylase proenzyme 1 [OS=Mus musculus]
	Echdc2	F6Z5N5	1.06	0.0417177	0.672359	submitted name: Enoyl Coenzyme A hydratase domain containing 2 [OS=Mus musculus]
11303	Abca1	P41233	1.05	0.0110325	0.484708	Phospholipid-transporting ATPase ABCA1 [OS=Mus musculus]
74145	F13a1	Q3V3W7	1.05	0.047016	0.680288	Transglutaminase-like domain-containing protein [OS=Mus musculus]
209378	Itih5	Q8BJD1	1.04	0.000454308	0.173617	Inter-alpha-trypsin inhibitor heavy chain H5 [OS=Mus musculus]
	Plce1	S4R1Q8	1.04	0.00605586	0.393122	Phosphoinositide phospholipase C [OS=Mus musculus]
214895	Lman2l	P59481	1.04	0.029953	0.636551	VIP36-like protein [OS=Mus musculus]
215008	Vezt	Q3ZK22	1.02	0.00778434	0.435258	Vezatin [OS=Mus musculus]
12834	Col6a2	Q02788	1.02	0.00931453	0.453282	Collagen alpha-2(VI) chain [OS=Mus musculus]
243385	Gprin3	Q8BWS5	1.01	0.00281983	0.315282	G protein-regulated inducer of neurite outgrowth 3 [OS=Mus musculus]
70207	Taco1	Q8K0Z7	0.99	0.0212279	0.587966	Translational activator of cytochrome c oxidase 1 [OS=Mus musculus]
641340	Nrbf2	Q8VCQ3	0.98	0.0105065	0.478469	Nuclear receptor-binding factor 2 [OS=Mus musculus]
545554	Ankrd34a	B2RW11	0.98	0.011854	0.500105	submitted name: Ankyrin repeat domain 34A [OS=Mus musculus]
14732	Gpam	Q61586	0.97	0.0242519	0.604019	Glycerol-3-phosphate acyltransferase 1, mitochondrial [OS=Mus musculus]
22166	Txn	P10639	0.96	0.0349884	0.659625	Thioredoxin [OS=Mus musculus]
66646	Rpe	Q8VEE0	0.95	0.0094447	0.453282	Ribulose-phosphate 3-epimerase [OS=Mus musculus]
108011	Ap4e1	Q80V94	0.94	0.00694595	0.419071	AP-4 complex subunit epsilon-1 [OS=Mus musculus]
245607	Gprasp2	Q8BUY8	0.9	0.0055265	0.388872	G-protein coupled receptor-associated sorting protein 2 [OS=Mus musculus]
226539	Dars2	Q8BIP0	0.9	0.0243961	0.604019	Aspartate--tRNA ligase, mitochondrial [OS=Mus musculus]
384009	Glipr2	Q9CYL5	0.89	0.0101887	0.472454	Golgi-associated plant pathogenesis-related protein 1 [OS=Mus musculus]
213326	Scyl2	Q8CFE4	0.89	0.0104959	0.478469	SCY1-like protein 2 [OS=Mus musculus]
104175	Sbk1	Q8QZX0	0.87	0.0216985	0.590395	Serine/threonine-protein kinase SBK1 [OS=Mus musculus]
67610	Rspry1	Q8BVR6	0.87	0.0450184	0.677653	RING finger and SPRY domain-containing protein 1 [OS=Mus musculus]
	Cacnb2	A0A9E9EN88	0.86	0.0465147	0.680288	Voltage-dependent L-type calcium channel subunit beta-2 [OS=Mus musculus]
67130	Ndufa6	Q9CQZ5	0.85	0.0263626	0.611489	NADH dehydrogenase [ubiquinone] 1 alpha subcomplex subunit 6 [OS=Mus musculus]
70834	Spag9	B8X349	0.85	0.035794	0.659625	submitted name: JNK-interacting leucine zipper protein long form [OS=Mus musculus]
27368	Tbl2	Q9R099	0.85	0.0164138	0.570131	Transducin beta-like protein 2 [OS=Mus musculus]
16332	Inppl1	Q6P549	0.84	0.00180094	0.286694	Phosphatidylinositol 3,4,5-trisphosphate 5-phosphatase 2 [OS=Mus musculus]
57752	Tacc2	E9Q8T1	0.84	0.0155709	0.556059	submitted name: Transforming, acidic coiled-coil containing protein 2 [OS=Mus musculus]
	Ogdh	Q60597-4	0.83	0.0194186	0.57567	Isoform 4 of 2-oxoglutarate dehydrogenase complex component E1 [OS=Mus musculus]
66681	Pgm2	Q7TSV4	0.83	0.0372825	0.660249	Phosphopentomutase [OS=Mus musculus]
214987	Derpc	P0CG14	0.83	0.0115587	0.496042	Decreased expression in renal and prostate cancer protein [OS=Mus musculus]
		J3KMQ6	0.82	0.00226732	0.303153	submitted name: RIKEN cDNA 5730455P16 gene [OS=Mus musculus]
71955	Ist1	Q9CX00	0.82	0.0148836	0.545971	IST1 homolog [OS=Mus musculus]
	Spred2	Q5SRF8	0.81	0.0181646	0.574619	Sprouty-related, EVH1 domain-containing protein 2 [OS=Mus musculus]
	C1qb	Q3U6I5	0.81	0.00770997	0.435258	C1q domain-containing protein [OS=Mus musculus]
103140	Arhgef26	Q99L20	0.8	0.02129	0.587966	Glutathione S-transferase theta-3 [OS=Mus musculus]
622434	Gstt3	D3YYY8	0.8	0.0117142	0.500105	submitted name: Rho guanine nucleotide exchange factor (GEF) 26 [OS=Mus musculus]
	Kcnab1	A0A5F8MPK0	0.79	0.0191191	0.574619	Voltage-gated potassium channel subunit beta-1 [OS=Mus musculus]
77766	Elp4	Q9ER73	0.79	0.00892105	0.451276	Elongator complex protein 4 [OS=Mus musculus]
269642	Bcat2	A0A0R4J0R4	0.79	0.0211321	0.587966	N-acetylaspartate synthetase [OS=Mus musculus]
	Nat8l	A0A1B0GX27	0.79	0.0132445	0.52678	Branched-chain-amino-acid aminotransferase [OS=Mus musculus]
	Tnc	Q8K0X1	0.78	0.00916528	0.453282	submitted name: Vascular cell adhesion molecule 1 [OS=Mus musculus]
21923	Vcam1	Q80YX1	0.78	0.00321168	0.318908	Tenascin [OS=Mus musculus]
68953	Chmp2a	Q9DB34	0.78	0.0122521	0.506259	Charged multivesicular body protein 2a [OS=Mus musculus]
66583	Exosc1	Q9DAA6	0.77	0.0240136	0.604019	Exosome complex component CSL4 [OS=Mus musculus]
67144	Lrrc40	A0A0R4J0W6	0.77	0.026885	0.611745	submitted name: Leucine rich repeat containing 40 [OS=Mus musculus]
74318	Hopx	Q8R1H0	0.76	0.0223215	0.597397	Homeodomain-only protein [OS=Mus musculus]
67790	Rab39b	Q0PD14	0.76	0.0068624	0.419071	submitted name: Rab39B [OS=Mus musculus]
	Bola3	E9Q705	0.76	0.045911	0.680288	submitted name: BolA-like 3 (E. coli) [OS=Mus musculus]
26951	Zw10	O54692	0.76	0.0221574	0.597397	Centromere/kinetochore protein zw10 homolog [OS=Mus musculus]
217593	Slc25a21	Q3TRZ4	0.76	0.0159502	0.566339	Mitochondrial 2-oxodicarboxylate carrier [OS=Mus musculus]
13405	Dmd	P11531	0.75	0.0245605	0.606555	Dystrophin [OS=Mus musculus]
224014	Fgd4	Q91ZT5	0.75	0.0377774	0.660249	FYVE, RhoGEF and PH domain-containing protein 4 [OS=Mus musculus]
66359	Cox20	Q9D7J4	0.74	0.043682	0.672359	Cytochrome c oxidase assembly protein COX20, mitochondrial [OS=Mus musculus]
108121	U2af1	Q9D883	0.74	0.0116289	0.497571	Splicing factor U2AF 35 kDa subunit [OS=Mus musculus]
	Impa2	Q8C4C7	0.73	0.00910472	0.453282	Oligophrenin-1 [OS=Mus musculus]
	Ophn1	Q3TC14	0.73	0.00702915	0.419071	Inositol-1-monophosphatase [OS=Mus musculus]
235402	Hk2	Q9D1T0	0.73	0.037147	0.660249	Leucine-rich repeat and immunoglobulin-like domain-containing nogo receptor-interacting protein 1 [OS=Mus musculus]
15277	Lingo1	O08528	0.73	0.0109849	0.484708	Hexokinase-2 [OS=Mus musculus]
20318	Sdf4	Q61112	0.72	0.0479182	0.680288	45 kDa calcium-binding protein [OS=Mus musculus]
211401	Mtss1	Q6ZQB7	0.72	0.0273018	0.613521	submitted name: MKIAA0429 protein [OS=Mus musculus]
14735	Gpc4	P51655	0.72	0.0119213	0.500416	Glypican-4 [OS=Mus musculus]
11514	Dnlz	P97490	0.72	0.02715	0.611745	Adenylate cyclase type 8 [OS=Mus musculus]
52838	Adcy8	Q9D113	0.72	0.0149152	0.546436	DNL-type zinc finger protein [OS=Mus musculus]
	Col18a1	P39061-1	0.71	0.0130275	0.522477	Isoform 2 of Collagen alpha-1(XVIII) chain [OS=Mus musculus]
53319	Nxf1	Q99JX7	0.71	0.0215743	0.58928	Nuclear RNA export factor 1 [OS=Mus musculus]
12262	C1qc	Q02105	0.71	0.00527114	0.387128	Complement C1q subcomponent subunit C [OS=Mus musculus]
11899	Astn1	Q3UHD7	0.71	0.0292231	0.629594	Astrotactin-1 [OS=Mus musculus]
	Pnpt1	Q3TST0	0.7	0.0205595	0.585011	polyribonucleotide nucleotidyltransferase [OS=Mus musculus]
14580	Gfap	P03995	0.7	0.0101156	0.471343	Glial fibrillary acidic protein [OS=Mus musculus]
12402	Cbl	P22682	0.7	0.0390718	0.666288	E3 ubiquitin-protein ligase CBL [OS=Mus musculus]
16519	Naa35	P63250	0.69	0.0264726	0.611489	G protein-activated inward rectifier potassium channel 1 [OS=Mus musculus]
78689	Kcnj3	Q6PHQ8	0.69	0.0183374	0.574619	N-alpha-acetyltransferase 35, NatC auxiliary subunit [OS=Mus musculus]
114644	Slc13a3	Q91Y63	0.69	0.0164468	0.570131	Na(+)/dicarboxylate cotransporter 3 [OS=Mus musculus]
94175	Hrg	A0A0R4J039	0.69	0.0497072	0.6823	Histidine-rich glycoprotein [OS=Mus musculus]
79554	Cntnap4	Q8BS40	0.69	0.00556651	0.388872	Ceramide-1-phosphate transfer protein [OS=Mus musculus]
	Cptp	Q8BPP6	0.69	0.000104311	0.0910221	Contactin-associated protein-like 4 [OS=Mus musculus]
73124	Golim4	D3YVW2	0.69	0.0381589	0.661845	submitted name: Golgi integral membrane protein 4 [OS=Mus musculus]
140492	Kcnn2	A0A1B0GT12	0.68	0.0134907	0.529242	submitted name: Potassium intermediate/small conductance calcium-activated channel, subfamily N, member 2 [OS=Mus musculus]
19271	Ptprj	E9Q4S7	0.68	0.0111094	0.484708	protein-tyrosine-phosphatase [OS=Mus musculus]
56839	Lgi1	Q9JIA1	0.68	1.83709e-05	0.0642987	Leucine-rich glioma-inactivated protein 1 [OS=Mus musculus]
	Kcnj10	B9EIV1	0.67	0.00208836	0.299798	submitted name: Kcnj10 protein [OS=Mus musculus]
16011	Igfbp5	Q3UQV0	0.67	0.000552388	0.173617	Insulin-like growth factor-binding protein 5 [OS=Mus musculus]
26385	Grk6	A0A286YDZ5	0.66	0.00876713	0.449355	G protein-coupled receptor kinase [OS=Mus musculus]
22320	Smc6	A0A0R4J0R1	0.66	0.027876	0.618212	Vesicle-associated membrane protein 8 [OS=Mus musculus]
67241	Vamp8	Q924W5	0.66	0.0162019	0.570131	Structural maintenance of chromosomes protein 6 [OS=Mus musculus]
14489	Mtpn	P62774	0.65	0.0293886	0.631076	Myotrophin [OS=Mus musculus]
	Lcp1	Q3TJX0	0.64	0.0461459	0.680288	Plastin-2 [OS=Mus musculus]
20273	Acot1	Q9WTU3	0.63	0.034861	0.659131	Sodium channel protein type 8 subunit alpha [OS=Mus musculus]
26897	Scn8a	O55137	0.63	0.00546657	0.388872	Acyl-coenzyme A thioesterase 1 [OS=Mus musculus]
18073	Nid1	P10493	0.63	0.00158468	0.283797	Nidogen-1 [OS=Mus musculus]
56615	Mgst1	Q53ZD4	0.63	0.0140447	0.530894	Microsomal glutathione S-transferase 1 [OS=Mus musculus]
	Aqp4	A0A5F8MQ17	0.61	0.000118855	0.100459	Aquaporin-4 [OS=Mus musculus]
99237	Tm9sf4	Q8BH24	0.61	0.000128373	0.102684	Transmembrane 9 superfamily member 4 [OS=Mus musculus]
18518	Igbp1	Q61249	0.61	0.0250696	0.609371	Immunoglobulin-binding protein 1 [OS=Mus musculus]
226519	Lamc1	F8VQJ3	0.6	0.00248113	0.310638	submitted name: Laminin, gamma 1 [OS=Mus musculus]
13200	Ddost	O54734	0.6	0.0271325	0.611745	Dolichyl-diphosphooligosaccharide--protein glycosyltransferase 48 kDa subunit [OS=Mus musculus]
228136	Zdhhc5	Q8VDZ4	0.6	0.0213915	0.588338	Palmitoyltransferase ZDHHC5 [OS=Mus musculus]
80898	Erap1	Q9EQH2	0.6	0.0404222	0.670236	Endoplasmic reticulum aminopeptidase 1 [OS=Mus musculus]
20354	Sema4d	O09126	0.59	0.0104391	0.478469	Semaphorin-4D [OS=Mus musculus]
74035	Entpd3	Q3TZX8	0.59	0.0407768	0.670248	Polynucleotide 5'-hydroxyl-kinase NOL9 [OS=Mus musculus]
215446	Nol9	Q8BFW6	0.59	0.0261679	0.611489	Ectonucleoside triphosphate diphosphohydrolase 3 [OS=Mus musculus]
12812	Coil	E9Q284	0.59	0.0284429	0.62425	submitted name: Coilin [OS=Mus musculus]
30960	Vapa	Q9WV55	0.57	0.0271338	0.611745	Vesicle-associated membrane protein-associated protein A [OS=Mus musculus]
243621	Iqsec3	Q3TES0	0.57	0.0435735	0.672359	IQ motif and SEC7 domain-containing protein 3 [OS=Mus musculus]
407786	Taf9b	A2AP82	0.57	0.037031	0.660249	submitted name: TATA-box binding protein associated factor 9B [OS=Mus musculus]
	Rab28	Q3UCZ5	0.57	0.0199111	0.576623	Tyrosine-protein phosphatase non-receptor type [OS=Mus musculus]
100972	Ptpn1	Q99KL7	0.57	0.0182662	0.574619	Ras-related protein Rab-28 [OS=Mus musculus]
13808	Eno3	P21550	0.56	0.0419465	0.672359	Beta-enolase [OS=Mus musculus]
68477	Megf8	Q80YQ8	0.56	0.0472806	0.680288	E3 ubiquitin-protein ligase RMND5A [OS=Mus musculus]
269878	Rmnd5a	P60882	0.56	0.0273657	0.614204	Multiple epidermal growth factor-like domains protein 8 [OS=Mus musculus]
13177	Eci1	P42125	0.56	0.0115114	0.495569	Enoyl-CoA delta isomerase 1, mitochondrial [OS=Mus musculus]
227632	Kcnt1	A2AHB8	0.56	0.0374626	0.660249	submitted name: Potassium channel, subfamily T, member 1 [OS=Mus musculus]
56709	Dnajb12	Q9QYI4	0.56	0.000168618	0.107222	DnaJ homolog subfamily B member 12 [OS=Mus musculus]
76630	Stambpl1	Q76N33	0.56	0.0271292	0.611745	AMSH-like protease [OS=Mus musculus]
	Nsun2	A0A1S6GWH4	0.54	0.00871032	0.449355	tRNA (cytosine(34)-C(5))-methyltransferase [OS=Mus musculus]
19349	Rab7a	P51150	0.53	0.0483028	0.680288	Ras-related protein Rab-7a [OS=Mus musculus]
100532	Rell1	Q8K2J7	0.53	0.00605732	0.393122	RELT-like protein 1 [OS=Mus musculus]
227059	Slc39a10	Q6P5F6	0.53	0.0182661	0.574619	Zinc transporter ZIP10 [OS=Mus musculus]
55936	Cpe	P70303	0.53	0.0390484	0.666288	CTP synthase 2 [OS=Mus musculus]
12876	Ctps2	Q543R4	0.52	0.00975655	0.45982	Carboxypeptidase E [OS=Mus musculus]
21817	Inpp5j	P21981	0.52	0.0169213	0.574619	Protein-glutamine gamma-glutamyltransferase 2 [OS=Mus musculus]
	Tgm2	Q3TBW1	0.52	0.000228972	0.125906	Inositol polyphosphate-related phosphatase domain-containing protein [OS=Mus musculus]
230793	Ahdc1	Q6PAL7	0.52	0.0148012	0.545033	Transcription factor Gibbin [OS=Mus musculus]
67247	Mtarc2	Q922Q1	0.52	0.0433579	0.672359	Mitochondrial amidoxime reducing component 2 [OS=Mus musculus]
56294	Ubash3b	O35239	0.51	0.0450008	0.677653	Tyrosine-protein phosphatase non-receptor type 9 [OS=Mus musculus]
72828	Ptpn9	Q8BGG7	0.51	0.00331187	0.32549	Ubiquitin-associated and SH3 domain-containing protein B [OS=Mus musculus]
52163	Pcyox1l	Q91YS8	0.51	0.0147272	0.544669	Calcium/calmodulin-dependent protein kinase type 1 [OS=Mus musculus]
240334	Camk1	Q8C7K6	0.51	0.00394346	0.344208	Prenylcysteine oxidase-like [OS=Mus musculus]
	Snx18	Q3U1H7	0.51	0.0403678	0.670236	Sorting nexin [OS=Mus musculus]
277468	Slc39a12	Q5FWH7	0.5	0.00114163	0.262995	Zinc transporter ZIP12 [OS=Mus musculus]
26446	Coq8b	Q545G0	0.5	0.0218678	0.593503	Proteasome subunit beta [OS=Mus musculus]
	Psmb3	Q566J8	0.5	0.00894842	0.451276	Atypical kinase COQ8B, mitochondrial [OS=Mus musculus]
60532	Wtap	E0CYH0	-0.52	0.0474726	0.680288	Pre-mRNA-splicing regulator WTAP [OS=Mus musculus]
20362	Septin8	B7ZC46	-0.52	0.0415523	0.672359	Septin [OS=Mus musculus]
21881	Tkt	P40142	-0.53	0.0206311	0.585045	Transketolase [OS=Mus musculus]
11538	Adnp	Q9Z103	-0.53	0.019763	0.57567	Activity-dependent neuroprotector homeobox protein [OS=Mus musculus]
20661	Sort1	Q6PHU5	-0.54	0.00554995	0.388872	Sortilin [OS=Mus musculus]
	Slc27a1	Q3TP13	-0.54	0.0212485	0.587966	long-chain-fatty-acid--CoA ligase [OS=Mus musculus]
19258	Epb41l2	Q9WU22	-0.55	0.0207767	0.587268	Tyrosine-protein phosphatase non-receptor type 4 [OS=Mus musculus]
	Ptpn4	Q3TLJ9	-0.55	0.0488962	0.680288	ethanolamine kinase [OS=Mus musculus]
13822	Chka	O70318	-0.56	0.00870399	0.449355	Band 4.1-like protein 2 [OS=Mus musculus]
	Tubgcp2	Q3TIB7	-0.56	0.0287813	0.625676	Gamma-tubulin complex component [OS=Mus musculus]
66233	Dmap1	Q9JI44	-0.56	0.000958795	0.240082	DNA methyltransferase 1-associated protein 1 [OS=Mus musculus]
66978	Luc7l	Q3TV90	-0.57	0.0259038	0.611489	RNA-binding protein Luc7-like 1 [OS=Mus musculus]
67971	Tppp3	Q9CRB6	-0.57	0.025378	0.609371	Tubulin polymerization-promoting protein family member 3 [OS=Mus musculus]
	Ahnak2	A0A7N9VR94	-0.58	0.0361675	0.660249	submitted name: AHNAK nucleoprotein 2 [OS=Mus musculus]
100169	Phactr4	Q501J7	-0.59	0.0307521	0.637969	Phosphatase and actin regulator 4 [OS=Mus musculus]
229285	Spart	Q8R1X6	-0.59	0.00330432	0.32549	Spartin [OS=Mus musculus]
666244	Tmsb15b1	A2AF33	-0.59	0.0124267	0.509322	Thymosin beta [OS=Mus musculus]
114715	Apoo	Q924S8	-0.59	0.030797	0.637969	Sprouty-related, EVH1 domain-containing protein 1 [OS=Mus musculus]
68316	Spred1	Q9DCZ4	-0.59	0.0137017	0.530894	MICOS complex subunit Mic26 [OS=Mus musculus]
	Igsf8	G3UYZ1	-0.6	0.0495446	0.681321	submitted name: Immunoglobulin superfamily, member 8 [OS=Mus musculus]
66234	Msmo1	Q9CRA4	-0.61	0.00604229	0.393122	Methylsterol monooxygenase 1 [OS=Mus musculus]
	Pdlim1	Q3TZ17	-0.61	0.0379238	0.660249	PDZ and LIM domain protein 1 [OS=Mus musculus]
238024	Fn3krp	Q8K274	-0.61	0.00735659	0.431197	Ketosamine-3-kinase [OS=Mus musculus]
16554	Kif13b	E9Q4K7	-0.62	0.0314967	0.637969	submitted name: Kinesin family member 13B [OS=Mus musculus]
57742	Abhd1	Q9QZC8	-0.62	0.0464815	0.680288	Protein ABHD1 [OS=Mus musculus]
71941	Cars2	Q8BYM8	-0.63	0.0171884	0.574619	Probable cysteine--tRNA ligase, mitochondrial [OS=Mus musculus]
66905	Plin3	Q9DBG5	-0.63	0.0193709	0.57567	Perilipin-3 [OS=Mus musculus]
	4930542C16Rik	Q9D4X8	-0.63	0.029656	0.632207	submitted name: Uncharacterized protein [OS=Mus musculus]
219149	Xkr6	E9Q6C8	-0.64	0.0133766	0.528738	XK-related protein 6 [OS=Mus musculus]
52502	Carhsp1	Q9CR86	-0.65	0.00801081	0.436265	Calcium-regulated heat stable protein 1 [OS=Mus musculus]
68262	Agpat4	Q8K4X7	-0.65	0.00260977	0.315282	1-acyl-sn-glycerol-3-phosphate acyltransferase delta [OS=Mus musculus]
108160	Fam50a	Q9WV03	-0.65	0.0142335	0.535119	Protein FAM50A [OS=Mus musculus]
	Mfn1	Q571M0	-0.66	0.0124486	0.509322	submitted name: MKIAA4032 protein [OS=Mus musculus]
100040531; 100040563; 100310872; 21648	Dynlt1	P51807	-0.67	0.0190092	0.574619	Dynein light chain Tctex-type 1 [OS=Mus musculus]
11486	Ada	Q4FK28	-0.68	0.00398046	0.344208	Adenosine deaminase [OS=Mus musculus]
216169	Abhd17a	Q99JW1	-0.68	0.0249541	0.608356	Alpha/beta hydrolase domain-containing protein 17A [OS=Mus musculus]
		B7U582	-0.69	0.000202134	0.118789	Heat shock-related 70 kDa protein 2 [OS=Mus musculus]
12349	Ca2	P00920	-0.69	0.00147692	0.283797	Carbonic anhydrase 2 [OS=Mus musculus]
67824	Nmral1	D3YU12	-0.69	0.0018036	0.286694	NmrA-like family domain-containing protein 1 [OS=Mus musculus]
225845	Plaat3	Q8R3U1	-0.69	0.00342334	0.334164	Phospholipase A and acyltransferase 3 [OS=Mus musculus]
	Psat1	Q3ULZ3	-0.74	0.00171171	0.283797	Phosphoserine aminotransferase [OS=Mus musculus]
13612	Edil3	O35474	-0.74	0.0178265	0.574619	EGF-like repeat and discoidin I-like domain-containing protein 3 [OS=Mus musculus]
14420	Galc	P54818	-0.74	0.0322916	0.640406	Galactocerebrosidase [OS=Mus musculus]
26417	Mapk3	Q63844	-0.74	0.0399564	0.670236	Mitogen-activated protein kinase 3 [OS=Mus musculus]
	Cacng5	Q8R4I0	-0.74	0.0421651	0.672359	submitted name: Voltage dependent calcium channel gamma 5 subunit [OS=Mus musculus]
12454	Ccnk	Q3U3M5	-0.75	0.0357092	0.659625	submitted name: Cyclin K [OS=Mus musculus]
77862	Thyn1	Q91YJ3	-0.76	0.0403328	0.670236	Thymocyte nuclear protein 1 [OS=Mus musculus]
67457	Frmd8	Q3UFK8	-0.78	0.0182172	0.574619	FERM domain-containing protein 8 [OS=Mus musculus]
74355	Smchd1	Q6P5D8	-0.78	0.0435238	0.672359	Structural maintenance of chromosomes flexible hinge domain-containing protein 1 [OS=Mus musculus]
16069	Jchain	P01592	-0.78	0.0283328	0.623755	Immunoglobulin J chain [OS=Mus musculus]
	Sirt2	Q8VDQ8-2	-0.79	0.00280679	0.315282	Isoform 2 of NAD-dependent protein deacetylase sirtuin-2 [OS=Mus musculus]
12417	Cbx3	Q9DCC5	-0.79	0.00944308	0.453282	submitted name: Cbx3 protein [OS=Mus musculus]
13643	Efnb3	O35393	-0.79	0.0211319	0.587966	Ephrin-B3 [OS=Mus musculus]
234094	Arhgef10	Q3UGZ6	-0.8	0.00942936	0.453282	DH domain-containing protein [OS=Mus musculus]
66222	Serpinb1a	Q9D154	-0.79	0.0142252	0.535119	Leukocyte elastase inhibitor A [OS=Mus musculus]
193813	Mcfd2	Q8K5B2	-0.8	0.0193871	0.57567	Multiple coagulation factor deficiency protein 2 homolog [OS=Mus musculus]
170442	Bbox1	Q924Y0	-0.81	0.0275765	0.61647	Gamma-butyrobetaine dioxygenase [OS=Mus musculus]
242864	Napepld	Q8BH82	-0.81	0.00860171	0.449355	N-acyl-phosphatidylethanolamine-hydrolyzing phospholipase D [OS=Mus musculus]
70549	Tln2	Q68FD6	-0.82	0.00592625	0.393122	submitted name: Tln2 protein [OS=Mus musculus]
76282	Gpt	Q8QZR5	-0.82	0.00403104	0.346501	Alanine aminotransferase 1 [OS=Mus musculus]
56212	Rhog	Q3UDZ1	-0.83	0.00873582	0.449355	Rho-related GTP-binding protein RhoG [OS=Mus musculus]
252864	Hars1	Q8R4V2	-0.85	0.0288511	0.625676	Dual specificity protein phosphatase 15 [OS=Mus musculus]
	Dusp15	Q3U890	-0.85	0.000341772	0.14636	Histidine--tRNA ligase, cytoplasmic [OS=Mus musculus]
	Tmpo	Q61029-3	-0.85	0.0386737	0.663676	Isoform Epsilon of Lamina-associated polypeptide 2, isoforms beta/delta/epsilon/gamma [OS=Mus musculus]
68845	Gorasp1	Q9CQJ2	-0.88	0.0402322	0.670236	PIH1 domain-containing protein 1 [OS=Mus musculus]
74498	Pih1d1	Q3TCN5	-0.88	0.00994162	0.466252	PDZ GRASP-type domain-containing protein [OS=Mus musculus]
66437	Fis1	Q9CQ92	-0.91	0.0252026	0.609371	Mitochondrial fission 1 protein [OS=Mus musculus]
	Mag	Q3T1F6	-0.92	0.0254786	0.609371	submitted name: Myelin-associated glycoprotein [OS=Mus musculus]
17777	Rasal1	O08601	-0.93	0.0358721	0.659625	Microsomal triglyceride transfer protein large subunit [OS=Mus musculus]
19415	Mttp	Q9Z268	-0.93	0.0279326	0.618212	RasGAP-activating-like protein 1 [OS=Mus musculus]
17988	Ndrg1	Q545R3	-0.93	0.00273031	0.315282	Protein NDRG1 [OS=Mus musculus]
12799	Cnp	Q3TYV5	-0.95	0.000240478	0.125906	2',3'-cyclic-nucleotide 3'-phosphodiesterase [OS=Mus musculus]
75456	Pls1	Q8C5R8	-0.96	0.047744	0.680288	ribose-phosphate diphosphokinase [OS=Mus musculus]
102502	Prps1l1	Q3V0K9	-0.96	0.0052107	0.387128	Plastin-1 [OS=Mus musculus]
30948	Bin1	Q6P1B9	-0.98	0.00375522	0.341635	submitted name: Bin1 protein [OS=Mus musculus]
20713	Serpini1	O35684	-0.98	0.0272957	0.613521	Neuroserpin [OS=Mus musculus]
77574	Tcaf1	Q8BNE1	-0.99	0.0246661	0.6076	TRPM8 channel-associated factor 1 [OS=Mus musculus]
16974	Lrp6	A0A0R4J0A9	-1	0.0438448	0.672359	Low-density lipoprotein receptor-related protein [OS=Mus musculus]
15441	Hp1bp3	Q3TEA8	-1.02	0.0427931	0.672359	Heterochromatin protein 1-binding protein 3 [OS=Mus musculus]
11537	Cfd	P03953	-1.02	0.0121769	0.505982	Complement factor D [OS=Mus musculus]
70799	Cep192	E9Q4Y4	-1.05	0.0277336	0.617423	submitted name: Centrosomal protein 192 [OS=Mus musculus]
100434	Slc44a1	A2AMH4	-1.05	0.0342204	0.653022	Choline transporter-like protein [OS=Mus musculus]
76580	Stx2	Q8R516	-1.06	0.0176918	0.574619	E3 ubiquitin-protein ligase MIB2 [OS=Mus musculus]
	Mib2	Q00262	-1.06	0.00601219	0.393122	Syntaxin-2 [OS=Mus musculus]
11565	Adss1	Q3UBP0	-1.07	0.0085379	0.449355	Adenylosuccinate synthetase isozyme 1 [OS=Mus musculus]
218629	Dhx29	Q6PGC1	-1.08	0.0426181	0.672359	ATP-dependent RNA helicase DHX29 [OS=Mus musculus]
	Cxno	A0A654IDS7	-1.08	0.00302096	0.315282	Gap junction protein [OS=Mus musculus]
17136	Mag	P20917	-1.08	0.000341175	0.14636	Myelin-associated glycoprotein [OS=Mus musculus]
18575	Pde1c	Q5D0E7	-1.08	0.0105843	0.478469	Phosphodiesterase [OS=Mus musculus]
94226	S1pr5	Q91X56	-1.1	0.000865765	0.228509	Sphingosine 1-phosphate receptor 5 [OS=Mus musculus]
58240	Hs1bp3	Q3TC93	-1.1	0.0305397	0.637969	HCLS1-binding protein 3 [OS=Mus musculus]
76960	Bcas1	Q80YN3	-1.1	3.11058e-05	0.0642987	Breast carcinoma-amplified sequence 1 homolog [OS=Mus musculus]
	Igh	Q66K04	-1.12	0.0426462	0.672359	submitted name: Igh protein [OS=Mus musculus]
71602	Myo1e	E9Q634	-1.13	0.000622069	0.188559	Unconventional myosin-Ie [OS=Mus musculus]
	Gltp	Q3U011	-1.13	0.00562438	0.388872	Glycolipid transfer protein [OS=Mus musculus]
64384	Sirt3	Q8R104	-1.17	0.00593917	0.393122	NAD-dependent protein deacetylase sirtuin-3 [OS=Mus musculus]
76441	Daam2	Q80U19	-1.18	0.00216819	0.30119	Disheveled-associated activator of morphogenesis 2 [OS=Mus musculus]
217893	Pacs2	A0A1Y7VLZ7	-1.18	0.00290731	0.315282	submitted name: Phosphofurin acidic cluster sorting protein 2 [OS=Mus musculus]
14388	Gab1	Q9QYY0	-1.21	0.0104215	0.478469	GRB2-associated-binding protein 1 [OS=Mus musculus]
16590	Kit	P05532	-1.24	0.000446045	0.173617	Mast/stem cell growth factor receptor Kit [OS=Mus musculus]
19877	Rock1	P70335	-1.26	0.00158492	0.283797	Rho-associated protein kinase 1 [OS=Mus musculus]
12856	Cox17	Q54AC6	-1.28	0.00534952	0.388022	submitted name: Cox17p [OS=Mus musculus]
67044	Prom1	Q9CQJ1	-1.28	0.0372633	0.660249	HIG1 domain family member 2A [OS=Mus musculus]
19126	Higd2a	A0A0R4J0B0	-1.28	0.00699952	0.419071	submitted name: Prominin 1 [OS=Mus musculus]
70361	Lman1	Q9D0F3	-1.29	0.0392649	0.666445	Protein ERGIC-53 [OS=Mus musculus]
225358	Fam13b	Q8K2H3	-1.31	0.0360988	0.660249	Protein FAM13B [OS=Mus musculus]
	Ndufs2	A0A0A6YXD3	-1.31	0.0197694	0.57567	NADH dehydrogenase [ubiquinone] iron-sulfur protein 2, mitochondrial [OS=Mus musculus]
	Mbp	P04370-4	-1.32	0.000536523	0.173617	Isoform 4 of Myelin basic protein [OS=Mus musculus]
	Mbp	A0A411P8U6	-1.32	0.000886491	0.228509	Myelin basic protein [OS=Mus musculus]
14763	Gpr37	Q9QY42	-1.33	0.0251619	0.609371	Prosaposin receptor GPR37 [OS=Mus musculus]
71733	Zpr1	Q9DBX3	-1.33	0.0193995	0.57567	Sushi domain-containing protein 2 [OS=Mus musculus]
	Susd2	Q9JJA1	-1.34	0.00817321	0.436265	submitted name: Brain cDNA, clone MNCb-6015, similar to Mus musculus zinc finger protein 259 (Zfp259), mRNA [OS=Mus musculus]
67801	Pllp	Q9DCU2	-1.39	0.00768937	0.435258	Plasmolipin [OS=Mus musculus]
11484	Aspa	Q8R3P0	-1.4	0.00555121	0.388872	Aspartoacylase [OS=Mus musculus]
77767	Ermn	Q5EBJ4	-1.45	0.00225759	0.303153	Ermin [OS=Mus musculus]
	Rftn1	Q8C4D5	-1.51	0.000821161	0.223077	Raftlin [OS=Mus musculus]
225896	Ubxn1	Q922Y1	-1.55	0.00671508	0.419071	UBX domain-containing protein 1 [OS=Mus musculus]
56461	Kcnip3	Q3YAB0	-1.57	0.00766129	0.435258	submitted name: Potassium channel interacting protein 3 [OS=Mus musculus]
338367	Myo1d	Q5SYD0	-1.59	0.00133097	0.283797	Unconventional myosin-Id [OS=Mus musculus]
70574	Cpm	Q80V42	-1.64	0.0026173	0.315282	Carboxypeptidase M [OS=Mus musculus]
22239	Ugt8	Q64676	-1.65	0.0023178	0.30469	2-hydroxyacylsphingosine 1-beta-galactosyltransferase [OS=Mus musculus]
	Ndk3	Q9JIK8	-1.69	0.000487985	0.173617	Nucleoside diphosphate kinase [OS=Mus musculus]
17433	Mobp	Q9D2P8	-1.69	0.00101787	0.244254	Myelin-associated oligodendrocyte basic protein [OS=Mus musculus]
17441	Mog	Q61885	-1.76	5.23775e-05	0.074698	Myelin-oligodendrocyte glycoprotein [OS=Mus musculus]
226115	Opalin	Q7M750	-1.9	0.00169014	0.283797	Opalin [OS=Mus musculus]
320981	Enpp6	Q8BGN3	-1.93	3.34121e-05	0.0642987	Glycerophosphocholine cholinephosphodiesterase ENPP6 [OS=Mus musculus]
109910	Zfp91	Q62511	-2	0.019647	0.57567	E3 ubiquitin-protein ligase ZFP91 [OS=Mus musculus]
15959	Ifit3	Q64345	-2.04	0.00471438	0.36855	Interferon-induced protein with tetratricopeptide repeats 3 [OS=Mus musculus]
	Fes	A0A0U1RPM2	-2.2	0.000778566	0.215861	Tyrosine-protein kinase [OS=Mus musculus]
664994	Isoc2a	P85094	-2.22	0.0334633	0.651007	Isochorismatase domain-containing protein 2A [OS=Mus musculus]
68743	Anln	Q8K298	-2.52	0.000289996	0.14636	Anillin [OS=Mus musculus]
17528	Mpz	A0A5F8MPM4	-2.9	0.0423992	0.672359	Myelin protein P0 [OS=Mus musculus]
66690	Tmem186	Q9CR76	-3.05	0.0380371	0.661422	Transmembrane protein 186 [OS=Mus musculus]
12955	Cryab	Q52L78	-3.8	2.80524e-05	0.0642987	Alpha-crystallin B chain [OS=Mus musculus]
