# Supplementary material for: ATM-kinase deficiency triggers early multi-compartment remodeling of the cerebellar microenvironment
Source: Research Square preprint supplement (doi:10.21203/rs.3.rs-8832557/v1), 2026-02-17
Supplement: Supplementary file 1 [file f3503429787977e7c596049b.docx]

| **Direction** | **Protein ID** | **Gene Symbol** |
| --- | --- | --- |
| **NEGATIVE** | Q3YAB0 | Kcnip3 |
| **NEGATIVE** | Q8C4D5 | Higd2a |
| **POSITIVE** | Q9CQJ1 | Cep192 |
| **NEGATIVE** | E9Q4Y4 | Plaat3 |
| **NEGATIVE** | Q8R3U1 | Tkt |
| **NEGATIVE** | P40142 | Golim4 |
| **POSITIVE** | A0A5F8MQ17 | Ankrd34a |
| **POSITIVE** | D3YVW2 | Tmem222 |
| **NEGATIVE** | B8X349 | Nmnat2 |
| **NEGATIVE** | B2RW11 | Sirt2 |
| **NEGATIVE** | Q8BVA2 | Ndk3 |
| **POSITIVE** | Q5HZI3 | Hk2 |
| **NEGATIVE** | Q684J2 | Bcat2 |

**Table S2.** Core phenotype-associated proteins identified by Spearman correlation analysis. Direction denotes the sign of the correlation with motor impairment: POSITIVE (worsening) or NEGATIVE (improvement). The list includes proteins central to NAD+ metabolism, bioenergetics, and stress response
